# Supplementary material for: New insights into the size and support effects of γ-Al2O3 supported Au catalysts for HCHO oxidation at room temperature
Source: Royal Society of Chemistry journal article supplement (doi:10.1039/d0cy00857e), 2020-01-01
Supplement: d0cy00857e1.pdf [file d0cy00857e1.pdf]

## Supporting Information

### **New insights into the size and support effects of $\gamma$ -Al<sub>2</sub>O<sub>3</sub> supported Au catalyst for HCHO oxidation at room temperature**

Bingbing Chen<sup>a</sup>, Qi Zhao<sup>a</sup>, Limei Yu<sup>a</sup>, Mark Crocker<sup>b</sup>, Chuan Shi<sup>a\*</sup>

<sup>a</sup> State Key Laboratory of Fine Chemicals, School of Chemical Engineering, Dalian  
University of Technology, Dalian 116024, China

<sup>b</sup> Center for Applied Energy Research, University of Kentucky, Lexington, KY 40511,  
USA

\* Corresponding author. Tel.: +86 411 84986083;

*E-mail address:* [chuanshi@dlut.edu.cn](mailto:chuanshi@dlut.edu.cn) (Chuan Shi).

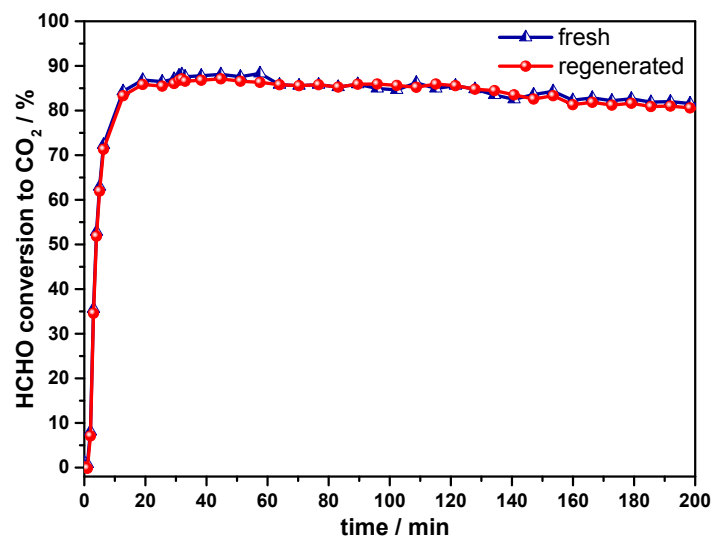

Fig. S1 Comparison of HCHO oxidation over fresh and regenerated 1 wt% Au/ $\gamma$ -Al<sub>2</sub>O<sub>3</sub>

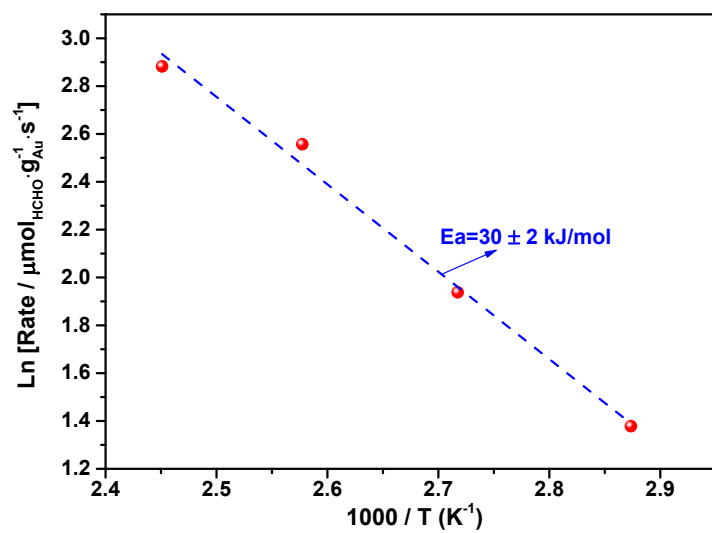

Fig. S2 Arrhenius-plot of HCHO oxidation over 1.5% Au/ $\gamma$ -Al<sub>2</sub>O<sub>3</sub> after NaCN leaching  
Conditions: 85 ppm HCHO/21%O<sub>2</sub>/N<sub>2</sub>, RH=50% (25 °C)

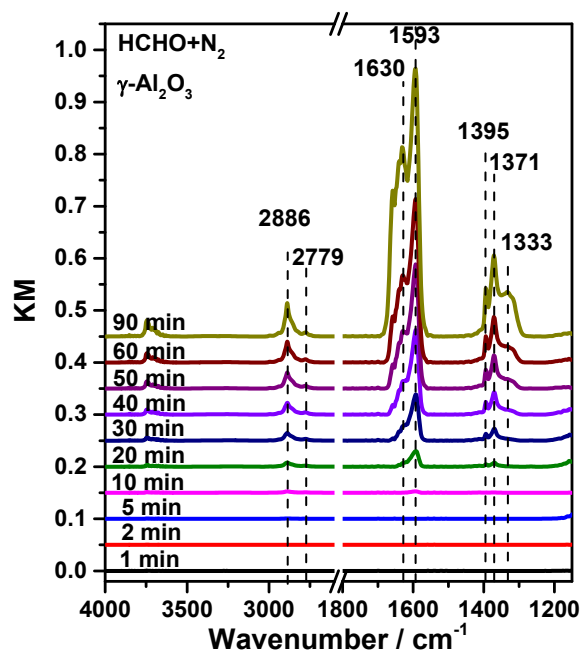

Fig. S3 In situ DRIFT spectra of HCHO adsorption on  $\gamma$ -Al<sub>2</sub>O<sub>3</sub>.  
Conditions: 85 ppm HCHO/N<sub>2</sub> R.T.

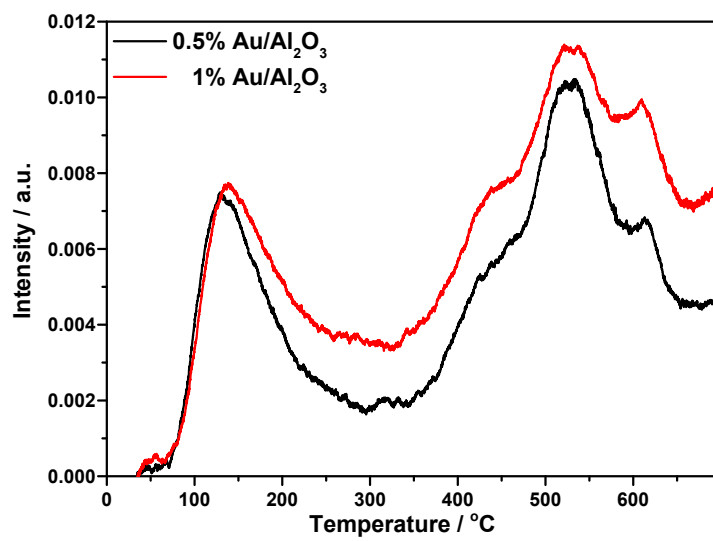

Fig. S4 O<sub>2</sub>-TPD profile of 0.5% Au/ $\gamma$ -Al<sub>2</sub>O<sub>3</sub> and 1% Au/ $\gamma$ -Al<sub>2</sub>O<sub>3</sub>

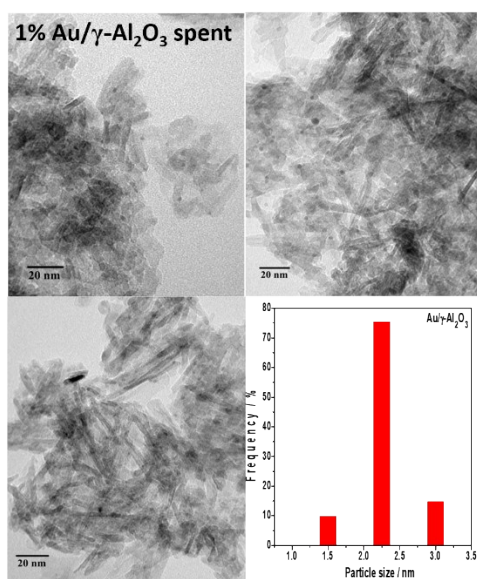

Fig. S5 TEM images of spent 1% Au/ $\gamma$ -Al<sub>2</sub>O<sub>3</sub> catalyst
